# Supplementary material for: Microtubule Hyperacetylation Enhances KL1-Dependent Micronucleation under a Tau Deficiency in Mammary Epithelial Cells
Source: PubMed Central journal article supplement (PMC6165458; doi:10.3390/ijms19092488), 2018-08-23
Supplement: ijms-19-02488-s001.pdf [file ijms-19-02488-s001.pdf]

# Supplementary Materials: Microtubule Hyperacetylation Enhances KL1-Dependent Micronucleation under a Tau Deficiency in Mammary Epithelial Cells

Haruka Sudo

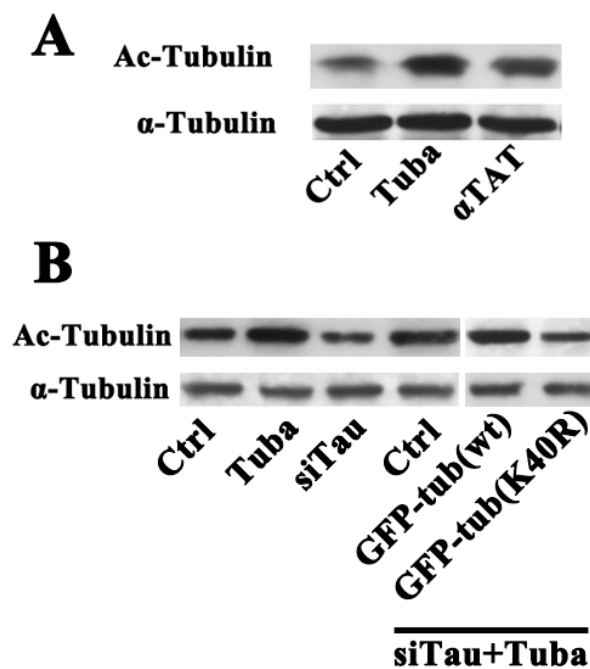

**Figure S1.** Western blot analysis of the effects of different experimental manipulations on endogenous microtubule acetylation. (A) RFL-6 cells were treated with tubacin (Tuba) or transfected with  $\alpha$ -TAT1 expression plasmids ( $\alpha$ TAT), and whole cell lysates were subjected to immunoblotting. (B) HMECs were treated with tubacin (Tuba), transfected with siRNA targeting tau (siTau), and transfected with wild-type tubulin (GFP-tub(wt)) or unacetylatable tubulin mutant (GFP-tub(K40R)) constructs. Whole cell lysates were then subjected to immunoblotting.

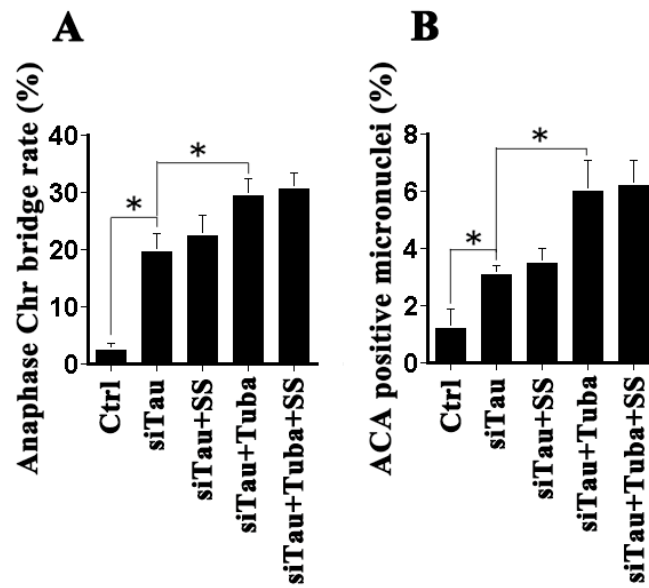

**Figure S2.** Effects of salicylate (SS) on tubacin-induced micronucleation in HMECs. HMECs were treated with tubacin (Tuba) and/or 5 mM SS, transfected with siRNA targeting tau (siTau). The cells were then stained for general tubulin, centromeres, and DNA as described also in Figure 5. (A) Bar graph showing quantification results for anaphase chromosome bridges in HMECs (>40 cells were counted). (B) Bar graph showing quantification results for ACA-positive micronucleation in HMECs (>200 cells were counted). No significant effects were observed on chromosome bridging or micronucleation. The asterisks indicate significant differences (Student's *t*-test,  $p < 0.01$ ).
